# Supplementary material for: Room Temperature Ferromagnetic Properties of Ga14N16−nGd2Cn Monolayers: A First Principle Study
Source: MDPI journal article supplement (doi:10.3390/cryst13030531), 2023-03-20
Supplement: s1 [file s1]

Archive with 1 entries (1 files):
- crystals-2272896-supplementary.pdf
