# Supplementary material for: Room Temperature Ferromagnetic Properties of Ga14N16−nGd2Cn Monolayers: A First Principle Study
Source: MDPI journal article supplement (doi:10.3390/cryst13030531), 2023-03-20
Supplement: s1 [file s1 › crystals-2272896-supplementary.pdf]

# Supplemental Material for

## Room temperature ferromagnetism properties of $\text{Ga}_{14}\text{N}_{16-n}\text{Gd}_2\text{C}_n$ monolayers: A first principle study

Shijian Tian <sup>1</sup>, Libo Zhang <sup>3,\*</sup>, Yuan Liang <sup>1,\*</sup>, Ruikuan Xie <sup>4</sup>, Li Han <sup>3</sup>, Shiqi Lan <sup>1</sup>,  
Aijiang Lu <sup>1</sup>, Yan Huang <sup>2,\*</sup>, Huaizhong Xing <sup>1,\*</sup>, Xiaoshuang Chen <sup>2</sup>

<sup>1</sup>*Department of Optoelectronic Science and Engineering, Donghua University, Shanghai 201620, China*

<sup>2</sup>*State Key Laboratory of Infrared Physics, Shanghai Institute of Technical Physics, Chinese Academy of Sciences, Shanghai 200083, China*

<sup>3</sup>*College of Physics and Optoelectronic Engineering, Hangzhou Institute for Advanced Study, University of Chinese Academy of Sciences, No. 1, Sub-Lane Xiangshan, Xihu District, Hangzhou 310024, China.*

<sup>4</sup>*State Key Laboratory of Structural Chemistry, Fujian Institute of Research on the Structure of Matter, Chinese Academy of Sciences (CAS), Fuzhou, 350002 Fujian, China.*

*\*Corresponding author*

Email: [zhanglibo@ucas.ac.cn](mailto:zhanglibo@ucas.ac.cn) (L. B. Zhang)

Email: [xinghz@dhu.edu.cn](mailto:xinghz@dhu.edu.cn) (H. Z. Xing).

Email: [yliang@dhu.edu.cn](mailto:yliang@dhu.edu.cn) (Y. Liang).

Email: [yhuang@mail.sitp.ac.cn](mailto:yhuang@mail.sitp.ac.cn) (Y. Huang).

To observe the effect of size, the band structures and PDOS of supercells  $4 \times 4 \times 1$  ( $\text{Ga}_{14}\text{N}_{16}\text{Gd}_2$ ),  $5 \times 5 \times 1$  ( $\text{Ga}_{23}\text{N}_{25}\text{Gd}_2$ ) and  $6 \times 6 \times 1$  ( $\text{Ga}_{34}\text{N}_{36}\text{Gd}_2$ ) are shown at Figure S1. It is found that the band structures are similar, the band gap values for the spin-up channels for the three sizes are 1.99 eV, 2.00 eV and 2.01 eV, respectively, while the spin-down channels are 2.05 eV, 2.07 eV, and 2.04 eV, respectively. For the three sizes of  $\text{Ga}_{14}\text{N}_{16}\text{Gd}_2$  monolayers, the band structures of spin-up and spin-down channel are similar, with an almost equivalent band gap. The size effect has ignorable influence on the electronic and magnetic properties of the Gd-pair doped GaN monolayer.

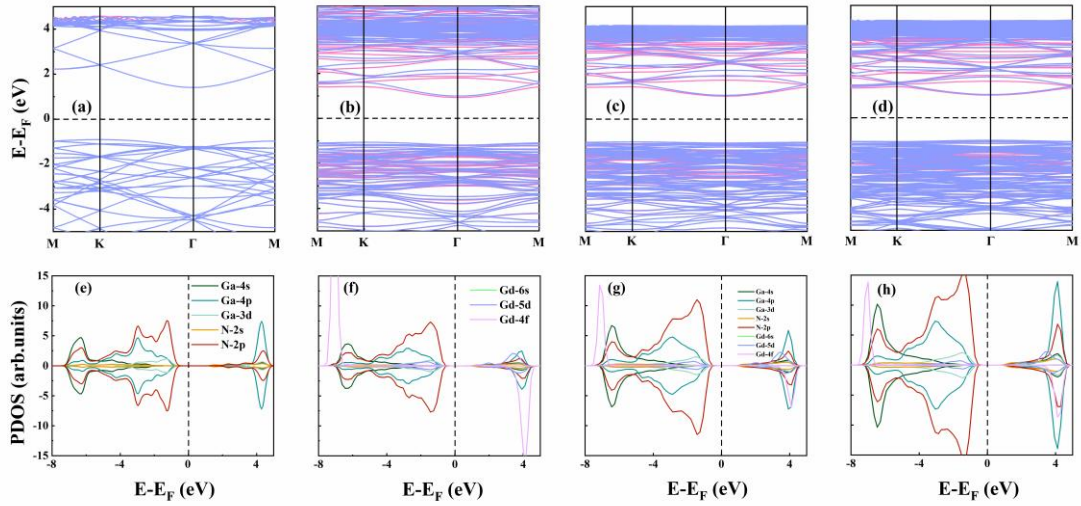

**Figure S1.** Band structures of (a)  $\text{Ga}_{16}\text{N}_{16}$  (b)  $\text{Ga}_{14}\text{N}_{16}\text{Gd}_2$ , (c)  $\text{Ga}_{23}\text{N}_{25}\text{Gd}_2$  and (d)  $\text{Ga}_{34}\text{N}_{36}\text{Gd}_2$  monolayers. The blue and pink solid lines in the band structure represent spin up and spin down channels, respectively. PDOS of (e)  $\text{Ga}_{16}\text{N}_{16}$  (f)  $\text{Ga}_{14}\text{N}_{16}\text{Gd}_2$ , (g)  $\text{Ga}_{23}\text{N}_{25}\text{Gd}_2$  and (h)  $\text{Ga}_{34}\text{N}_{36}\text{Gd}_2$  monolayers. The dash lines present the fermi-level which is taken to be 0.

The magnetic coupling between Gd and C atoms are studied by mapping the total energy to the classical Heisenberg model. The nearest-neighboring exchange coupling is considered to associated with the magnetic phase and label it as  $J$ . The Hamiltonian can be defined as:

$$H = -J_1 \sum_{\langle i, j \rangle} S_i S_j \quad 1$$

In the formula,  $S$  is the spin vector;  $\langle i, j \rangle$  is summation over the nearest-neighboring Gd-pair. The energies of magnetic states can be described as:

$$E_{\text{FM}} = E_0 - 3JS^2, \quad E_{\text{AFM}} = E_0 + JS^2$$

$E_0$  is the reference energy. Thus, the magnetic coupling parameter ( $J$ ) can be defined as:

$$J = (E_{\text{AFM}} - E_{\text{FM}}) / 4S^2 \quad 2$$

The corresponding atomic structure is shown at Figure 1, the positions of the C-atom doping are marked as the numbers inserted in Figure 1a. The  $E_b$ ,  $\Delta E$ ,  $M_{\text{total}}$ ,  $J$  [39] and  $T_C$  are studied by PBE method are shown at Table S1 and S2. It can be observed that the  $E_b$  and  $M_{\text{total}}$  of the FM phase are equivalent for a fixed C concentration, indicating that the substituted sites substitution has no impact on the structural stability and magnetic moment. However, the structural stability decreases with the increase of C concentration. **For example, when the C atom concentration reaches 12.5% (4 C atoms), the magnetic state is no more stable and the structural stability decreases by 16.49%.** It can be seen that the substitutional impurity of C atom has significant effect on the ground state of GaN: Gd monolayers, not all doping scheme maintain positive  $\Delta E$  and  $J$ . The positive  $\Delta E$  and  $J$  values indicate the FM phase, which is detected in the following configurations: [M], [1, 3], [M, 6], [M, 8], [2, 3, 5], [M, 5, 7] and [M, 5, 7, 8]. Negative values indicating AFM phases which are detected the following configurations: [1], [4], [5], [8], [1, 2], [5, 7], [M, 1], [M, 2], [1, 2, 3], [5, 6, 7], [1, M, 2], [1, M, 3], [2, M, 5] and [M, 4, 6, 7].

**Table S1.** The  $E_b$  of FM phase, total magnetic moments ( $M_{\text{total}}$ ),  $\Delta E$  ( $E_{\text{AFM}}-E_{\text{FM}}$ ), nearest-neighboring exchange ( $J$ ), estimated  $T_C^{\text{FMA}}$  and  $T_C$  of  $\text{Ga}_{14}\text{N}_{16}\text{Gd}_2$ ,  $\text{Ga}_{14}\text{N}_{15}\text{Gd}_2\text{C}_1$ ,  $\text{Ga}_{14}\text{N}_{14}\text{Gd}_2\text{C}_2$ ,  $\text{Ga}_{14}\text{N}_{13}\text{Gd}_2\text{C}_3$ ,  $\text{Ga}_{14}\text{N}_{12}\text{Gd}_2\text{C}_4$ , respectively.

|                                                            | $E_b$<br>(eV) | $M_{\text{total}}$<br>( $\mu_B$ ) | $\Delta E$<br>(meV) | $J$<br>(meV) | $T_C^{\text{FMA}}$<br>(K) | $T_C$<br>(K)  |
|------------------------------------------------------------|---------------|-----------------------------------|---------------------|--------------|---------------------------|---------------|
| <b><math>\text{Ga}_{14}\text{N}_{16}\text{Gd}_2</math></b> | <b>-5.64</b>  | <b>14.00</b>                      | <b>-4.08</b>        | <b>-0.08</b> | -                         | -             |
| [1]                                                        | -5.56         | 15.00                             | -3.82               | -0.08        | -                         | -             |
| [4]                                                        | -5.57         | 15.00                             | -10.26              | -0.21        | -                         | -             |
| [5]                                                        | -5.57         | 15.00                             | -4.04               | -0.08        | -                         | -             |
| [8]                                                        | -5.57         | 15.00                             | -1.90               | -0.04        | -                         | -             |
| <b>[M]</b>                                                 | -5.54         | 15.00                             | 15.05               | 0.31         | 58.22                     | 35.51         |
| [1, 2]                                                     | -5.48         | 16.00                             | -0.77               | -0.02        | -                         | -             |
| [5, 7]                                                     | -5.50         | 16.00                             | -0.90               | -0.02        | -                         | -             |
| [M, 1]                                                     | -5.47         | 16.00                             | -1767.19            | -36.07       | -                         | -             |
| [M, 2]                                                     | -5.47         | 16.00                             | -1770.46            | -36.13       | -                         | -             |
| <b>[1, 3]</b>                                              | -5.48         | 16.00                             | 14.77               | 0.30         | 57.13                     | 34.85         |
| <b>[M, 6]</b>                                              | -5.48         | 16.00                             | 14.14               | 0.29         | 54.70                     | 33.36         |
| <b>[M, 8]</b>                                              | <b>-5.48</b>  | <b>16.00</b>                      | <b>111.81</b>       | <b>2.26</b>  | <b>428.63</b>             | <b>261.46</b> |
| [2, M, 5]                                                  | -5.08         | 17.00                             | -2222.17            | -45.36       | -                         | -             |
| [1, M, 2]                                                  | -5.07         | 17.00                             | -2335.62            | -47.67       | -                         | -             |
| [1, M, 3]                                                  | -5.08         | 17.00                             | -2409.58            | -49.18       | -                         | -             |
| [1, 2, 3]                                                  | -5.09         | 17.00                             | -0.49               | -0.01        | -                         | -             |
| [5, 6, 7]                                                  | -5.12         | 17.00                             | -61.21              | -1.25        | -                         | -             |
| [2, 3, 5]                                                  | -5.10         | 17.00                             | 51.26               | 1.05         | 198.28                    | 120.95        |
| <b>[M, 5, 7]</b>                                           | -5.10         | 17.00                             | 82.55               | 1.68         | 319.32                    | 194.78        |
| <b>[M, 4, 6, 7]</b>                                        | -4.71         | 18.00                             | -3.34               | -0.07        | -                         | -             |
| <b>[M, 5, 7, 8]</b>                                        | -4.71         | 18.00                             | 155.12              | 3.17         | 600.03                    | 366.02        |

The PDOS of following examples are shown in Fig. S2, which are used to investigate the underlying mechanisms of the above phenomena: [1], [4], [M, 2], [5, 7], [2, M, 5] and [1, M, 2]. It is shown that one of the factors causing the negative  $\Delta E$  and

J is due to the apparently weaker p-d coupling between the Gd-5d and C-2p states near the Fermi level ([1], [4] and [5, 7] in Figure S3). In addition, the energy of the AFM state of the special substitution site is reduced dramatically, resulting in AFM ground state, such as [M, 2], [2, M, 5], [1, M, 2] (shown in Figure S4). In summary, we define the ideal scheme with a stable FM phase and relatively high  $T_C$ : one C atoms at M positions and other C atoms bonded without Gd atoms: (M), (M, 8) and (M, 5, 7).

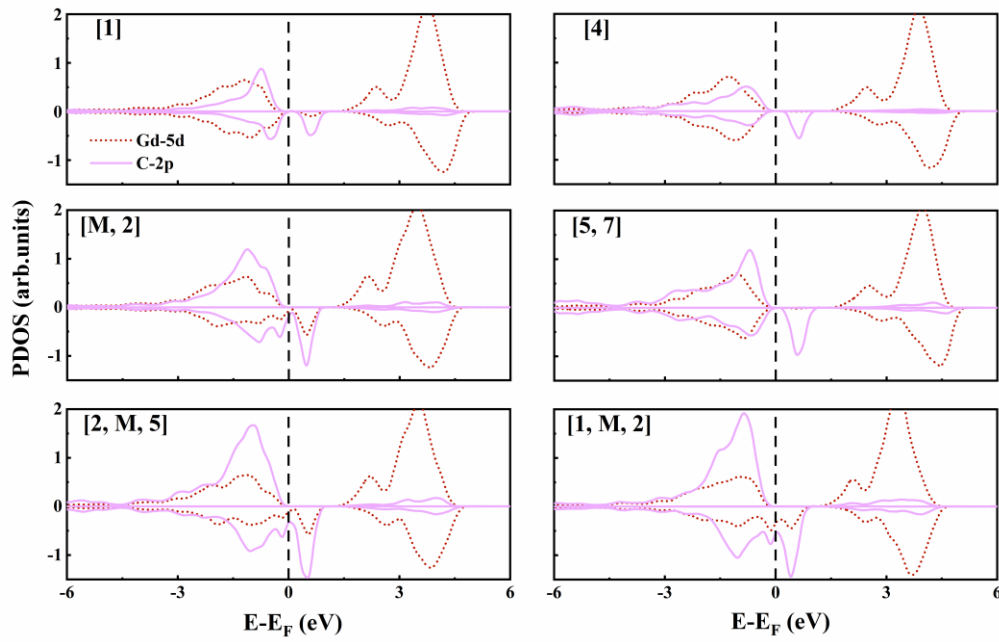

**Figure S2.** PDOS with FM states of different substitution site: [1], [4], [M, 2], [5, 7], [2, M, 5] and [1, M, 2].

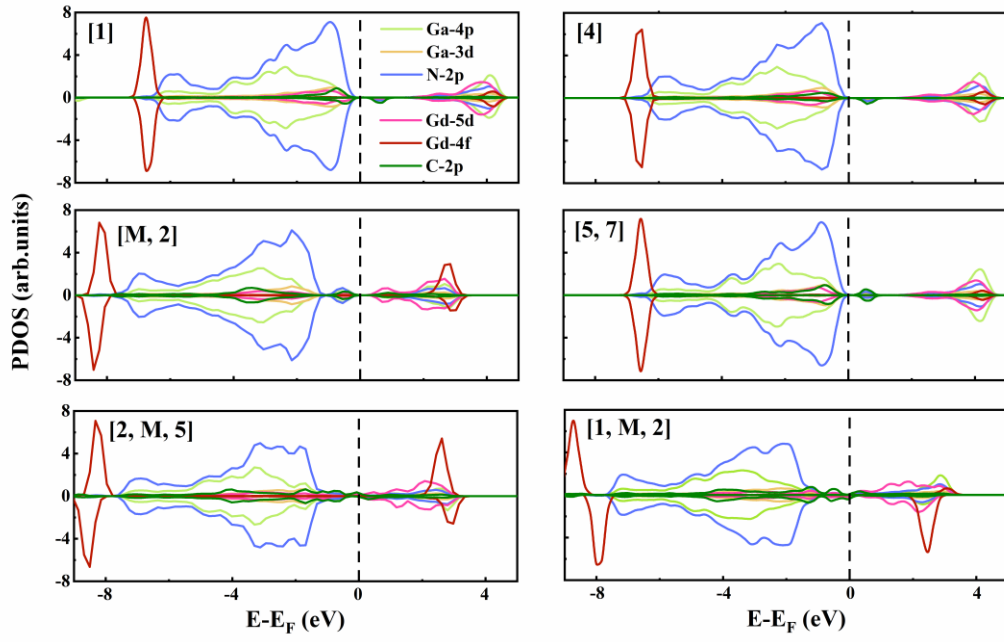

**Figure S3.** PDOS with AFM states of different substitution site: [1], [4], [M, 2], [5, 7], [2, M, 5] and [1, M, 2].

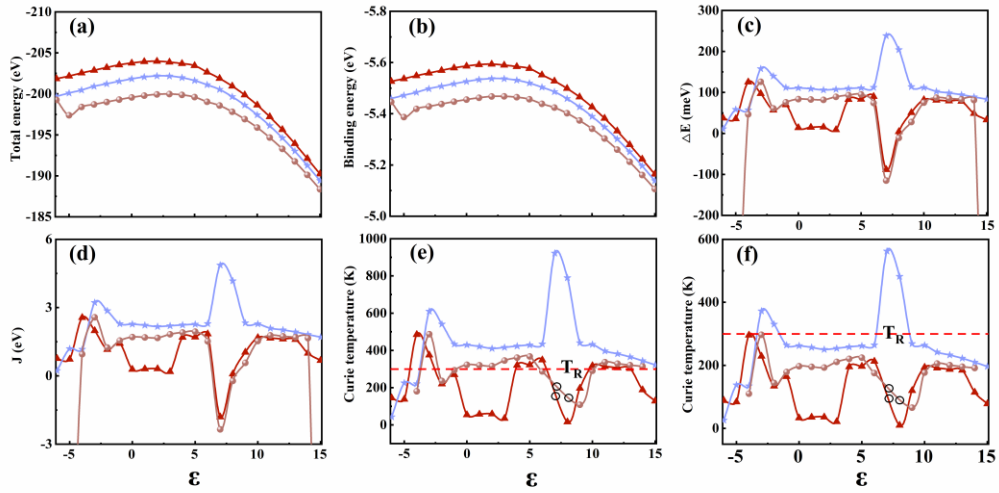

**Figure S4.** (a)  $E_{\text{total}}$  of FM phase, (b)  $E_b$ , (c)  $\Delta E$  (d)  $J$ , (e)  $T_C^{\text{FMA}}$  and (f)  $T_C$  of  $\text{Ga}_{14}\text{N}_{16-n}\text{Gd}_2\text{C}_n$  monolayers computed by the PBE method with SOC. The dark blue (triangle), light blue (pentagram) and brown (circle) lines in the diagram represent  $\text{Ga}_{14}\text{N}_{15}\text{Gd}_2\text{C}_1$ ,  $\text{Ga}_{14}\text{N}_{14}\text{Gd}_2\text{C}_2$  and  $\text{Ga}_{14}\text{N}_{13}\text{Gd}_2\text{C}_3$  monolayers, respectively. The black circles in the last two figures indicate this position as an AFM state without  $T_C$ .

**Table S2.** A brief summary of the magnetic properties for doped GaN materials.

| Materials                                        | Magnetic type | Magnetic moment | T <sub>C</sub> | Ref. |
|--------------------------------------------------|---------------|-----------------|----------------|------|
| Ga <sub>35</sub> N <sub>36</sub> Mn              | FM            | 4.0 $\mu_B$     | -              | [5]  |
| Ga <sub>35</sub> N <sub>36</sub> Cu <sub>2</sub> | FM            | 4.0 $\mu_B$     | -              | [14] |
| Ga <sub>16</sub> N <sub>15</sub> Fe              | FM            | 5.0 $\mu_B$     | -              |      |
| Ga <sub>16</sub> N <sub>15</sub> Co              | FM            | 4.0 $\mu_B$     | -              | [15] |
| Ga <sub>16</sub> N <sub>15</sub> Ru              | FM            | 5.0 $\mu_B$     | -              |      |
| Ga <sub>16</sub> N <sub>15</sub> Dy              | FM            | 5.1 $\mu_B$     | -              | [19] |
| Ga <sub>16</sub> N <sub>14</sub> GdSm            | FM            | 12.01 $\mu_B$   | -              | [20] |
| CrBr <sub>3</sub>                                | FM            | -               | 34K            | [40] |
| CrI <sub>3</sub>                                 | FM            | -               | 45K            | [41] |
| Fe <sub>3</sub> GeTe <sub>2</sub>                | FM            | -               | 130K           | [42] |
| CrSe <sub>2</sub>                                | FM            | -               | 65K            | [43] |
| CrGeTe <sub>3</sub>                              | FM            | -               | 30K            | [44] |
